# Supplementary material
Source: ML conference proceedings conference paper supplement (https://openreview.net/forum?id=fStMpzKkjMT)
Supplement: supplementary_material [file attachment]

# WHY DOES DECENTRALIZED TRAINING OUTPERFORM SYNCHRONOUS TRAINING IN THE LARGE BATCH SETTING?

**Anonymous authors**

Paper under double-blind review

## ABSTRACT

Distributed Deep Learning (DDL) is essential for large-scale Deep Learning (DL) training. Using a sufficiently large batch size is critical to achieving DDL runtime speedup. In a large batch setting, the learning rate must be increased to compensate for the reduced number of parameter updates. However, a large batch size may converge to sharp minima with poor generalization, and a large learning rate may harm convergence. Synchronous Stochastic Gradient Descent (SSGD) is the de facto DDL optimization method. Recently, Decentralized Parallel SGD (DPSGD) has been proven to achieve a similar convergence rate as SGD and to guarantee linear speedup for non-convex optimization problems. While there was anecdotal evidence that DPSGD outperforms SSGD in the large-batch setting, no systematic study has been conducted to explain why this is the case. Based on a detailed analysis of the DPSGD learning dynamics, we find that DPSGD introduces additional landscape-dependent noise, which has two benefits in the large-batch setting: 1) it automatically adjusts the learning rate to improve convergence; 2) it enhances weight space search by escaping local traps (e.g., saddle points) to find flat minima with better generalization. We conduct extensive studies over 12 state-of-the-art DL models/tasks and demonstrate that DPSGD consistently outperforms SSGD in the large batch setting; and DPSGD converges in cases where SSGD diverges for large learning rates. Our findings are consistent across different application domains, Computer Vision and Automatic Speech Recognition, and different neural network models, Convolutional Neural Networks and Long Short-Term Memory Recurrent Neural Networks.

## 1 INTRODUCTION

Deep Learning (DL) has revolutionized AI training across application domains: Computer Vision (CV) (Krizhevsky et al., 2012; He et al., 2015), Natural Language Processing (NLP) (Vaswani et al., 2017), and Automatic Speech Recognition (ASR) (Hinton et al., 2012). Stochastic Gradient Descent (SGD) is the fundamental optimization method used in DL training. Due to massive computational requirements, Distributed Deep Learning (DDL) is the preferred mechanism to train large scale Deep Learning (DL) tasks. In the early days, Parameter Server (PS) based Asynchronous SGD (ASGD) training was the preferred DDL approach (Dean et al., 2012; Li et al., 2014) as it did not require strict system-wide synchronization. Recently, ASGD has lost popularity due to its unpredictability and often inferior convergence behavior (Zhang et al., 2016b). Practitioners now favor deploying Synchronous SGD (SSGD) on homogeneous High Performance Computing (HPC) systems. The degree of parallelism in a DDL system is dictated by batch size: the larger the batch size, the more parallelism and higher speedup can be expected. However, large batches require a larger learning rate and overall they may negatively affect model accuracy because 1) large batch training usually converges to sharp minima which do not generalize well (Keskar et al., 2016) and 2) large learning rates may violate the conditions (i.e., the smoothness parameter) required for convergence in nonconvex optimization theory (Ghadimi & Lan, 2013). Although training longer with large batches could lead to better generalization (Hoffer et al., 2017), doing so gives up some or all of the speedup we seek. Through meticulous hyper-parameter design (e.g., learning rate) tailored to each specific task, SSGD-based DDL systems have enabled large batch training and shortened training time for some challenging CV tasks (Goyal et al., 2017; You et al., 2017) and NLP tasks (You et al., 2019) from weeks to hours or less. However, it is observed that SSGD with large batch size leads to large training loss and inferior model quality for ASR tasks (Zhang et al., 2019b), as illustrated in Figure 1a (red curve). In this paper we found for other types of tasks (e.g. CV) and DL models, large batch SSGD has the same problem (Figure 1b and Figure 1c). The cause of this problem could be that training gets trapped at saddle points since large batches reduce the magnitude of noise in the

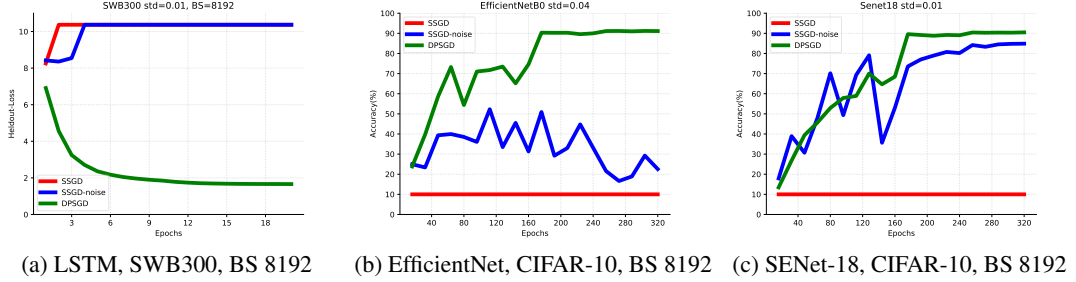

Figure 1: SSGD (red) does not converge in the large batch setting. Figure 1a plots the heldout-loss, the lower the better. Figure 1b and Figure 1c plot the model accuracy, the higher the better. By injecting Gaussian noise, SSGD might escape early traps but result in much worse model (blue) compared to DPSGD (green) in the large batch setting. The detailed task descriptions and training recipes are described in Section 4.3. BS stands for Batch-Size.

stochastic gradient and prevent the algorithm from exploring the whole parameter space. To solve this problem, one may add isotropic noise (e.g., spherical Gaussian) to help SSGD escape from saddle points (Ge et al., 2015). However, this is not a good solution for high-dimensional DL training as shown in the blue curves of Figure 1. One possible reason is that the complexity of escaping a saddle point by adding isotropic noise has a polynomial dependency on the dimension of the parameter space, so adding such noise in a high dimensional space (such as deep learning) does not bring significant benefits. In this paper, we have found that Decentralized Parallel SGD (DPSGD) (Lian et al., 2017b) greatly improves large batch training performance, as illustrated in the green curves in Figure 1. Unlike SSGD, where each learner updates its weights by taking a global average of all learners’ weights, DPSGD updates each learner’s weights by taking a partial average (i.e., across a subset of neighboring learners). Therefore, in DPSGD, each learner’s weights differ from the weights of other learners.<sup>1</sup> The key difference among SSGD, SSGD with Gaussian noise<sup>2</sup> and DPSGD is the source of noise during the update, and this noise directly affects performance in deep learning. This naturally motivates us to study *Why decentralized training outperform synchronous training in the large batch setting?* More specifically, we try to understand whether their performance difference is caused by their different noise. We answer these questions from both theoretical and empirical perspectives. Our contributions are:

- We analyze the dynamics of DDL algorithms, including both SSGD and DPSGD. We show, both theoretically and empirically, that the *intrinsic noise* in DPSGD can 1) reduce the effective learning rate when the gradient is large to help convergence; 2) enhance the search in weight space for flat minima with better generalization.
- We conduct extensive empirical studies of 12 CV and ASR tasks with state-of-the-art CNN and LSTM models. Our experimental results demonstrate that DPSGD consistently outperforms SSGD, across application domains and Neural Network (NN) architectures in the large batch setting, *without any hyper-parameter tuning*. To the best of our knowledge, we are unaware of any generic algorithm that can improve SSGD large batch training on this many models/tasks.

The remainder of this paper is organized as follows. Section 2 details the problem formulation and learning dynamics analysis of SSGD, SSGD+Gaussian, and DPSGD; Section 3 and Section 4 detail the empirical results; and Section 5 concludes the paper.

## 2 ANALYSIS OF STOCHASTIC LEARNING DYNAMICS AND EFFECTS OF LANDSCAPE-DEPENDENT NOISE

We first formulate the dynamics of an SGD based learning algorithm with multiple ( $n > 1$ ) learners indexed by  $j = 1, 2, 3, \dots, n$  following the same theoretical framework established for a single learner (Chaudhari & Soatto, 2018). At each given time (iteration)  $t$ , each learner has its own weight vector  $\vec{w}_j(t)$ , and the average weight vector  $\vec{w}_a(t)$  is defined as:  $\vec{w}_a(t) \equiv n^{-1} \sum_{j=1}^n \vec{w}_j(t)$ .

<sup>1</sup>The detailed DPSGD algorithm and its learning dynamics are described in Section 2.

<sup>2</sup>We use the terms "SSGD with Gaussian noise" and "SSGD\*" interchangeably in this paper.

Each learner  $j$  updates its weight vector according to the cross-entropy loss function  $L^{\mu_j(t)}(\vec{w})$  for minibatch  $\mu_j(t)$  that is assigned to it at time  $t$ . The size of the local minibatch is  $B$ , and the overall batch size for all learners is  $nB$ . Two multi-learner algorithms are described below.

**(1) Synchronous Stochastic Gradient Descent (SSGD):** In the synchronous algorithm, the learner  $j \in [1, n]$  starts from the average weight vector  $\vec{w}_a$  and moves along the gradient of its local loss function  $L^{\mu_j(t)}$  evaluated at the average weight  $\vec{w}_a$ :

$$\vec{w}_j(t+1) = \vec{w}_a(t) - \alpha \nabla L^{\mu_j(t)}(\vec{w}_a(t)), \quad (1)$$

where  $\alpha$  is the learning rate.

**(2) Decentralized Parallel SGD (DPSGD):** In the DPSGD algorithm (Lian et al., 2017a), learner  $j$  computes the gradient at its own local weight  $\vec{w}_j(t)$ . The learning dynamics follows:

$$\vec{w}_j(t+1) = \vec{w}_{s,j}(t) - \alpha \nabla L^{\mu_j(t)}(\vec{w}_j(t)). \quad (2)$$

where  $\vec{w}_{s,j}(t)$  is the starting weight set to be the average weight of a subset of “neighboring” learners of learner- $j$ , which corresponds to the non-zero entries in the mixing matrix defined in (Lian et al., 2017a) (note that  $\vec{w}_{s,j} = \vec{w}_a$  if all learners are included as neighbors).

By averaging over all learners, the learning dynamics for the average weight  $\vec{w}_a$  for both SSGD and DPSGD can be written formally the same way as:  $\vec{w}_a(t+1) = \vec{w}_a(t) - \alpha \vec{g}_a$ , where  $\vec{g}_a = n^{-1} \sum_{j=1}^n \vec{g}_j$  is the average gradient and  $\vec{g}_j$  is the gradient from learner- $j$ . The difference between SSGD and DPSGD is the weight at which  $\vec{g}_j$  is computed:  $\vec{g}_j \equiv \nabla L^{\mu_j(t)}(\vec{w}_a(t))$  is computed at  $\vec{w}_a$  for SSGD;  $\vec{g}_j \equiv \nabla L^{\mu_j(t)}(\vec{w}_j(t))$  is computed at  $\vec{w}_j$  for DPSGD.

By projecting the weight displacement vector  $\Delta \vec{w}_a \equiv \alpha \vec{g}_a$  onto the direction of the gradient  $\vec{g} \equiv \nabla L(\vec{w}_a)$  of the overall loss function  $L$  at  $\vec{w}_a$ , we can write the learning dynamics as:

$$\vec{w}_a(t+1) = \vec{w}_a(t) - \alpha_e \vec{g} + \vec{\eta}, \quad (3)$$

where  $\alpha_e \equiv \alpha \vec{g}_a \cdot \vec{g} / \|\vec{g}\|^2$  is an effective learning rate and  $\vec{\eta} = -\alpha \vec{g}_a + \alpha_e \vec{g}$  is the noise term that describes the stochastic weight dynamics in directions orthogonal to  $\vec{g}$ . The noise term has zero mean  $\langle \vec{\eta} \rangle_\mu = 0$  and its strength is characterized by its variance  $\Delta(t) \equiv \|\vec{\eta}\|^2$ .  $\Delta$  and  $\alpha_e$  are related by the equality:  $\alpha_e^2 \|\vec{g}\|^2 + \Delta = \alpha^2 \|\vec{g}_a\|^2$ , which indicates that a higher noise strength  $\Delta$  leads to a lower effective learning rate  $\alpha_e$ .

The noise strength  $\Delta$  (and hence  $\alpha_e$ ) is different in SSGD and DPSGD. The DPSGD noise  $\Delta_{DP}$  is larger than the SSGD noise  $\Delta_S$  by an additional noise  $\Delta^{(2)} (> 0)$  that originates from the difference of local weights ( $\vec{w}_j$ ) from their mean ( $\vec{w}_a$ ):  $\Delta_{DP} = \Delta_S + \Delta^{(2)}$ , see Appendix B for details. By expanding  $\Delta^{(2)}$  w.r.t.  $\Delta \vec{w}_j \equiv \vec{w}_j - \vec{w}_a$ , we obtain the average  $\Delta^{(2)}$  over minibatch ensemble  $\{\mu\}$ :

$$\langle \Delta^{(2)} \rangle_\mu \equiv \alpha^2 \langle \|\sum_{j=1}^n [\nabla L^{\mu_j}(\vec{w}_j) - \nabla L^{\mu_j}(\vec{w}_a)]\|^2 \rangle_\mu \approx \alpha^2 \sum_{k,l,l'} H_{kl} H_{kl'} C_{ll'}, \quad (4)$$

where  $H_{kl} = \nabla_{kl}^2 L$  is the Hessian matrix of the loss function and  $C_{ll'} = n^{-2} \sum_{j=1}^n \Delta w_{j,l} \Delta w_{j,l'}$  is the weight covariance matrix. It is clear that  $\Delta^{(2)}$  depends on the loss landscape – it is larger in rough landscapes and smaller in flat landscapes.

It is important to stress that the noise  $\vec{\eta}$  in Eq.3 is not an artificially added noise. It is intrinsic to the use of minibatches (random subsampling) in SGD-based algorithms and is enhanced by the difference among different learners in DPSGD. The noise strength  $\Delta$  varies in weight space via its dependence on the loss landscape, as explicitly shown in Eq.4. However, besides its landscape dependence, SGD noise also depends inversely on the minibatch size  $B$  (Chaudhari & Soatto, 2018). With  $n$  synchronized learners, the noise in SSGD scales as  $1/(nB)$ , which is too small to be effective for a large batch size  $nB$ . A main finding of our paper is that the additional landscape-dependent noise  $\Delta^{(2)}$  in DPSGD can make up for the small SSGD noise when  $nB$  is large and help enhance convergence and generalization in the large batch setting.

In the following, we investigate the effects of this landscape-dependent noise for SSGD and DPSGD using the MNIST dataset where each learner is a fully connected network with two hidden layers (50 units per layer). We focus on the large batch setting using  $nB = 2000$  in the experiments.

### 2.1 NOISE IN DPSGD REDUCES EFFECTIVE LEARNING RATE TO HELP CONVERGENCE

First, we study a case with a large learning rate  $\alpha = 1$ . In this experiment, we used  $n = 5$ , and  $\vec{w}_{s,j} = \vec{w}_a$  for DPSGD. As shown in the upper panel of Fig. 2(a), DPSGD converges to a solution with low loss (2.1% test error), but SSGD fails to converge. As shown in Fig. 2(a) (lower panel), the effective learning rate  $\alpha_e$  is reduced in DPSGD during early training ( $0 \leq t \leq 700$ ) while  $\alpha_e$  in SSGD remains roughly the same as  $\alpha$ . This reduction of  $\alpha_e$  caused by the stronger noise  $\Delta$  in DPSGD is essential for convergence by avoiding overshoots when gradients are large in the beginning of the training process. In the later stage of the training process when gradients are smaller, the landscape-dependent DPSGD noise decreases and  $\alpha_e$  increases back to be  $\approx \alpha$ . To show the importance of the landscape-dependent noise, we introduce a variant of SSGD, SSGD\*, by injecting a Gaussian noise with a constant variance to weights in SSGD. However, most choices of this injected noise fail to converge. Only by fine tuning the injected noise strength can SSGD\* converge, but to an inferior solution with much higher loss and test error (5.7%). The poor performance is likely due to the persistent reduction of  $\alpha_e$  even in the later stage of training (see Fig. 2(a) (lower panel)) since the added Gaussian noise in SSGD\* is independent of the loss landscape.

This insight on reducing learning rate is consistent with nonconvex optimization theory (Ghadimi & Lan, 2013; Lian et al., 2017b). When we use a larger batch size, stochastic gradient has smaller variance, and nonconvex optimization is able to choose a larger learning rate without affecting its convergence. However, the learning rate should be limited by  $1/l_s$  where  $l_s$  is the smoothness parameter. In the very large batch setting, the learning rate under the linear scaling rule (Goyal et al., 2017) may indeed exceed this limit ( $1/l_s$ ). Here, we show that these conflicting requirements can be resolved in DPSGD where the enhanced landscape-dependent noise adaptively adjusts the effective learning rate by reducing  $\alpha_e$  when the loss landscape is rough with large gradients and restoring to the original large  $\alpha$  when the landscape is smooth. In Appendix E, we consider a simple synthetic problem where we show that the larger noise in DPSGD allows the algorithm to escape saddle points in the loss function landscape while the SSGD algorithm gets stuck for a long time.

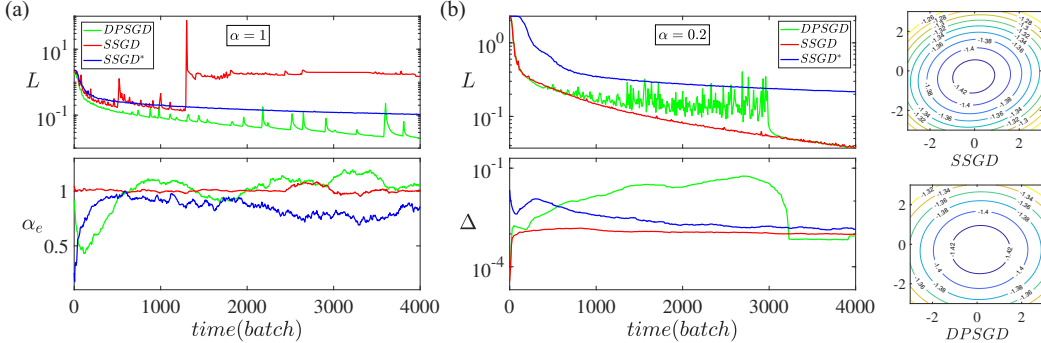

Figure 2: Comparison of different multi-learner algorithms, DPSGD (green), SSGD (red), and SSGD\* (blue). (a) For a large learning rate  $\alpha = 1$ , the lowered effective learning rate  $\alpha_e$  in DPSGD in the beginning of training allows DPSGD to converge while SSGD fails to converge. SSGD\* also converges but to an inferior solution. (b) For a smaller  $\alpha = 0.2$ , DPSGD finds a flatter minimum with a lower test error than SSGD. SSGD\* has the worst performance. See text for detailed description.

### 2.2 NOISE IN DPSGD ENHANCES SEARCH TO FIND FLAT MINIMA WITH BETTER GENERALIZATION

Next, we consider a case with a smaller learning rate  $\alpha = 0.2$ . Here we used  $n = 6$  and  $\vec{w}_{s,j}(t)$  in DPSGD is the average weight of 2 neighbors on each side. In this case, both SSGD and DPSGD can converge to a solution, but their learning dynamics are different. As shown in Fig. 2(b) (upper panel), while the training loss  $L$  of SSGD (red) decreases smoothly, the DPSGD training loss (green) fluctuates widely during the time window (1000-3000) when it stays significantly above the SSGD training loss. As shown in Fig. 2(b) (lower panel), these large fluctuations in  $L$  are caused by the high and increasing noise level in DPSGD. This elevated noise level in DPSGD allows the algorithm to search in a wider region in weight space. At around time 3000(batch), the DPSGD loss decreases suddenly and eventually converges to a solution with a similar training loss as SSGD. However, despite their similar final training loss, the DPSGD loss landscape is flatter (contour lines further

|      | CIFAR10         |            |           |            |              |           |
|------|-----------------|------------|-----------|------------|--------------|-----------|
|      | EfficientNet-B0 | SENet-18   | VGG-19    | ResNet-18  | DenseNet-121 | MobileNet |
| Size | 11.11 MB        | 42.95 MB   | 76.45 MB  | 42.63 MB   | 26.54 MB     | 12.27 MB  |
| Time | 2.92 Hr         | 1.58 Hr    | 1.08 Hr   | 1.37 Hr    | 5.48 Hr      | 1.02 Hr   |
|      | CIFAR10         |            |           |            | SWB300       | SWB2000   |
|      | MobileNetV2     | ShuffleNet | GoogleNet | ResNext-29 | LSTM         | LSTM      |
| Size | 8.76 MB         | 4.82 MB    | 23.53 MB  | 34.82 MB   | 164.62 MB    | 164.62 MB |
| Time | 1.96 Hr         | 2.46 Hr    | 5.31 Hr   | 4.55 Hr    | 26.88 Hr     | 203.21 Hr |

Table 1: Evaluated workload model size and training time. Training time is measured when running on 1 V100 GPU. CIFAR-10 is trained with batch size 128 for 320 epochs. SWB-300 and SWB-2000 are trained with batch size 128 for 16 epochs.

apart) than SSGD landscape. Remarkably, the DPSGD solution has a lower test error (2.3%) than the test error of the SSGD solution (2.6%). We have also tried the SSGD\* algorithm, but the performance (3.9% test error) is worse than both *SSGD* and *DPSGD*.

To understand their different generalization performance, we studied the loss function landscape around the SSGD and DPSGD solutions. The contour plots of the loss function  $L$  around the two solutions are shown in the two right panels in Fig. 2(b). We found that the loss landscape near the DPSGD solution is flatter than the landscape near the SSGD solution despite having the same minimum loss. Our observation is consistent with (Keskar et al., 2016) where it was found that SSGD with a large batch size converges to a sharp minimum which does not generalize well. Our results are in general agreement with the current consensus that flatter minima have better generalization (Hinton & van Camp, 1993; Hochreiter & Schmidhuber, 1997; Baldassi et al., 2016; Chaudhari et al., 2016; Zhang et al., 2018b). It was recently suggested that the landscape-dependent noise in SGD-based algorithms can drive the system towards flat minima (Feng & Tu, 2020). However, in the large batch setting, the SSGD noise is too small to be effective. The additional landscape-dependent noise  $\Delta^{(2)}$  in DPSGD, which also depends inversely on the flatness of the loss function (see Eq. 4), is thus critical for the system to find flatter minima in the large batch setting.

### 3 EXPERIMENTAL METHODOLOGY

We implemented SSGD and DPSGD using PyTorch, OpenMPI, and NVidia NCCL. We run experiments on a cluster of 8-V100-GPU x86 servers. For CV tasks, we evaluated on CIFAR-10 (50,000 samples, 178MB). For ASR tasks, we evaluate on SWB-300 (300 hours training data, 4,000,000 samples, 30GB) and SWB-2000 (2000 hours training data, 30,000,000 samples, 216GB)<sup>3</sup>. We evaluate on 12 state-of-the-art NN models: 10 CNN models and 2 6-layer bi-directional LSTM models. We summarize the model size and training time in Table 1. We refer readers to Appendix D for software implementation, hardware configuration, dataset and Neural Network (NN) model details.

## 4 EXPERIMENTAL RESULTS

All the large batch experiments are conducted on 16 GPUs (learners) if not stated otherwise. Batches are evenly distributed among learners, e.g., each learner uses a local batch size of 128, when the overall batch size is 2048. A learner randomly picks a neighbor with which to exchange weights in each iteration (Zhang et al., 2020).

### 4.1 SSGD AND DPSGD COMPARISON ON CV TASKS

For CIFAR-10 tasks, we use the hyper-parameter setup proposed in (Liu, 2020): a baseline batch size 128 and learning rate 0.1 for the first 160 epochs, learning rate 0.01 for the next 80 epochs, and learning rate 0.001 for the remaining 80 epochs. Using the same learning rate schedule, we keep increasing the batch size up to 8192. Table 2 records test accuracy under different batch sizes. Model accuracy consistently deteriorates beyond batch size 1024 because the learning rate is too small for the number of parameter updates.

To improve model accuracy beyond batch size 1024, we apply the linear scaling rule (i.e., linearly increase learning rate w.r.t batch size) (He et al., 2015; Zhang et al., 2019a; Goyal et al., 2017; Zhang et al., 2016b;a). We use learning rate 0.1 for batch size 1024, 0.2 for batch size 2048, 0.4 for batch size 4096, and 0.8 for batch size 8192. Table 3 compares SSGD and DPSGD performance running with 16 GPUs (learners). SSGD and DPSGD perform comparably up to batch size 4096. When the batch size increases to 8192, DPSGD outperforms SSGD in all but one case. Most noticeably, SSGD

<sup>3</sup>SWB-2000 training is more challenging than ImageNet. It takes over 200 hours on 1 V100 GPU to finish training SWB-2000. SWB-2000 has 32,000 highly unevenly distributed classes whereas ImageNet has 1000 evenly distributed classes.

|                 | Batch Size   |              |              |              |       |       |       |
|-----------------|--------------|--------------|--------------|--------------|-------|-------|-------|
|                 | 128          | 256          | 512          | 1024         | 2048  | 4096  | 8192  |
| EfficientNet-B0 | 87.51        | 89.32        | 91.28        | <b>91.92</b> | 90.62 | 88.00 | 84.85 |
| SENet-18        | <b>95.18</b> | 94.84        | 94.83        | 94.52        | 93.83 | 92.94 | 91.69 |
| VGG-19          | 93.51        | <b>93.78</b> | 93.35        | 93.12        | 92.64 | 91.82 | 87.76 |
| ResNet-18       | <b>95.44</b> | 95.26        | 95.08        | 94.59        | 94.96 | 92.98 | 91.24 |
| DenseNet-121    | 95.06        | 95.27        | <b>95.42</b> | 95.11        | 94.81 | 93.09 | 92.34 |
| MobileNet       | 89.53        | 90.96        | <b>92.39</b> | 92.24        | 91.22 | 89.54 | 86.59 |
| MobileNetV2     | 90.52        | 92.93        | 94.17        | <b>94.99</b> | 93.71 | 91.97 | 89.81 |
| ShuffleNet      | 90.4         | 92.27        | 92.82        | <b>93.15</b> | 91.94 | 90.59 | 87.81 |
| GoogleNet       | 94.99        | 95.06        | 94.97        | <b>95.32</b> | 94.05 | 92.78 | 91.09 |
| ResNext-29      | 95.35        | <b>95.66</b> | 95.31        | 95.42        | 94.24 | 93.00 | 91.06 |

Table 2: CIFAR-10 accuracy (%) with different batch size. Across runs, learning rate is set as 0.1 for first 160 epochs, 0.01 for the next 80 epochs and 0.001 for the last 80 epochs. Model accuracy consistently deteriorates when batch size is over 1024. Bold text in each row represents the highest accuracy achieved for the corresponding model, e.g., EfficientNet-B0 achieves highest accuracy at 91.92% with batch size 1024.

|         |          | Eff-B0       | SE-18        | VGG          | Res-18       | Dense-121    | Mobile       | MobileV2     | Shuffle      | Google       | ResNext-29   |
|---------|----------|--------------|--------------|--------------|--------------|--------------|--------------|--------------|--------------|--------------|--------------|
| bs=128  | Baseline | 87.51        | 95.18        | 93.51        | 95.44        | 95.06        | 89.53        | 90.52        | 90.40        | 94.99        | 95.35        |
| lr=0.1  |          |              |              |              |              |              |              |              |              |              |              |
| bs=1024 | SSGD     | <b>91.92</b> | 94.52        | 93.12        | 94.59        | 95.11        | 92.24        | <b>94.99</b> | 93.15        | <b>95.32</b> | 95.42        |
| lr=0.1  | DPSGD    | 91.69        | <b>94.55</b> | <b>93.15</b> | <b>94.98</b> | <b>95.12</b> | <b>92.52</b> | 94.36        | <b>93.55</b> | 95.18        | <b>95.72</b> |
| bs=2048 | SSGD     | <b>91.69</b> | 94.36        | 92.64        | <b>94.96</b> | 95.11        | 91.72        | 94.24        | <b>92.91</b> | 94.76        | 94.19        |
| lr=0.2  | DPSGD    | 91.06        | <b>94.70</b> | <b>93.05</b> | 94.86        | <b>95.32</b> | <b>92.72</b> | <b>94.51</b> | 92.89        | <b>94.80</b> | <b>95.30</b> |
| bs=4096 | SSGD     | <b>91.62</b> | 94.28        | 92.68        | 94.30        | 94.72        | 91.68        | <b>94.25</b> | <b>92.67</b> | 94.36        | 93.21        |
| lr=0.4  | DPSGD    | 91.23        | <b>94.58</b> | <b>92.72</b> | <b>94.78</b> | <b>95.24</b> | <b>92.03</b> | 94.12        | 92.20        | <b>94.99</b> | <b>94.32</b> |
| bs=8192 | SSGD     | 10           | 10           | 87.11        | 92.70        | 92.79        | 91.10        | <b>93.22</b> | 92.09        | 93.72        | 92.38        |
| lr=0.8  | DPSGD    | <b>91.13</b> | <b>90.48</b> | <b>90.52</b> | <b>94.34</b> | <b>94.79</b> | <b>91.80</b> | 93.09        | <b>92.36</b> | <b>93.84</b> | <b>92.55</b> |

Table 3: CIFAR-10 comparison for batch size 2048, 4096 and 8192, with learning rate set as 0.2, 0.4 and 0.8 respectively. All experiments are conducted on 16 GPUs (learners), with batch size per GPU 128, 256 and 512 respectively. Bold texts represent the best model accuracy achieved given the specific batch size and learning rate. When batch size is 8192, DPSGD significantly outperforms SSGD. The batch size 128 baseline is presented for reference. bs stands for batch-size, lr stands for learning rate.

diverges in EfficientNet-B0 and SENet-18 when the batch-size is 8192. Figure 6 in Appendix C details model accuracy progression w.r.t epochs in each setting.

To better understand the loss landscape in SSGD and DPSGD training, we visualize the landscape contour 2D projection and Hessian 2D projection, using the same mechanism as in (Li et al., 2018). For both plots, we randomly select two  $N$ -dim vectors (where  $N$  is the number of parameters in each model) and multiply with a scaling factor evenly sampled from -0.1 to 0.1 in a  $K \times K$  grid to generate  $K^2$  perturbations of the trained model. To produce a contour plot, we calculate the testing data loss of the perturbed model at each point in the  $K \times K$  grid. Figure 3 depicts the 2D contour plot for representative models (at the end of the 320th epoch) in a  $50 \times 50$  grid. DPSGD training leads not only to a lower loss but also much more widely spaced contours, indicating a flatter loss landscape and more generalizable solution. For the Hessian plot, we first calculate the maximum eigen value  $\lambda_{\max}$  and minimum eigen value  $\lambda_{\min}$  of the model’s Hessian matrix at each sample point in a  $4 \times 4$  grid. We then calculate the ratio  $r$  between  $|\lambda_{\min}|$  and  $|\lambda_{\max}|$ . The lower  $r$  is, the more likely it is in a convex region and less likely in a saddle region. We then plot the heatmap of this  $r$  value in this  $4 \times 4$  grid. The corresponding models are trained at the 16-th epoch (i.e. the first 5% training phase) and the corresponding Hessian plot Figure 4 indicates DPSGD is much more effective at avoiding early traps (e.g., saddle points) than SSGD.

*Summary* DPSGD outperforms SSGD for 9 out of 10 CV tasks in the large batch setting. Moreover, SSGD diverges on the EfficientNet-B0 and SENet-18 tasks. DPSGD is more effective at avoiding early traps (e.g., saddle points) and reaching better solutions than SSGD in the large batch setting.

#### 4.2 SSGD AND DPSGD COMPARISON ON ASR TASKS

For the SWB-300 and SWB-2000 tasks, we follow the same learning rate schedule proposed in (Zhang et al., 2019a): we use learning rate 0.1 for baseline batch size 256, and linearly warmup

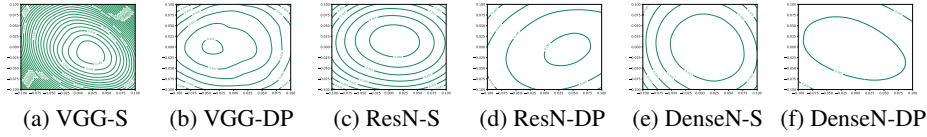

Figure 3: CIFAR-10 2D contour plot. The more widely spaced contours represent a flatter loss landscape and a more generalizable solution. The distance between each contour line is 0.005 across all the plots. We plot against the model trained at the end of 320th epoch. VGG: VGG-19, ResN: ResNet-18, DenseN: DenseNet-121, -S: -SSGD, -DP: -DPSGD

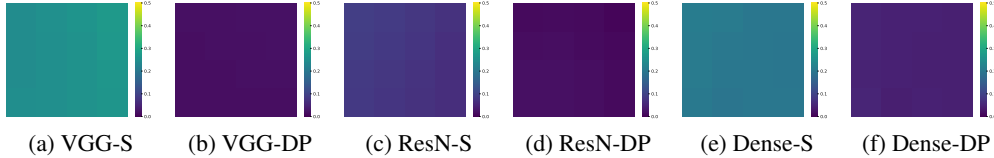

Figure 4: CIFAR-10 Hessian heatmap on a 4x4 grid. The lower value (i.e. a cooler color) indicates the corresponding point is less likely in a saddle. We plotted against the models at the end of the 16th epoch. DPSGD is much more effective at avoiding early traps (e.g., saddle points) than SSGD. VGG: VGG-19, ResN: ResNet-18, DenseN: DenseNet-121, -S: -SSGD, -DP: -DPSGD

learning rate w.r.t the baseline batch size for the first 10 epochs before annealing learning rate by  $\frac{1}{\sqrt{2}}$  for the remaining 10 epochs. For example, when using a batch size 2048, we linearly warmup the learning rate to 0.8 by the end of the 10th epoch before annealing. Table 4 illustrates heldout loss for SWB-300 and SWB-2000. In the SWB-300 task, SSGD diverges beyond batch size 2048 and DPSGD converges well until batch size 8192. In the SWB-2000 task, SSGD diverges beyond batch size 4096 and DPSGD converges well until batch size 8192. Figure 7 in Appendix C details heldout loss progression w.r.t epochs.

**Summary** For ASR tasks, SSGD diverges whereas DPSGD converges to baseline model accuracy in the large batch setting.

#### 4.3 NOISE-INJECTION AND LEARNING RATE TUNING

In 4 out of 12 studied tasks, a large batch setting leads to a complete divergence in SSGD: EfficientNet-B0, SENet-18, SWB-300 and SWB-2000. As discussed in Section 2, the intrinsic landscape-dependent noise in DPSGD effectively helps escape early traps (e.g., saddle points) and improves training by automatically adjusting learning rate. In this section, we demonstrate these facts by systematically adding Gaussian noise (the same as the *SSGD\** algorithm in Section 2) and decreasing the learning rate. We find that SSGD might escape early traps but still results in a much inferior model compared to DPSGD.

**Noise-injection** In Figure 1, we systematically explore Gaussian noise injection with mean 0 and standard deviation (std) ranging from 10 to 0.00001 via binary search (i.e. roughly 20 configurations for each task). We found in the vast majority of the setups, noise-injection cannot escape early traps. In EfficientNet-B0, only when std is set to 0.04, does the model start to converge, but to a very bad loss (test accuracy 22.15% in SSGD vs 91.13% in DPSGD). In SENet-18, when std is set to 0.01, the model converges to a reasonable accuracy (84.86%) but still significantly lags behind its DPSGD counterpart (90.48%). In the SWB-300 case, when std is 0.01, SSGD shows an early sign of

|       | SWB-300 |        |        | SWB-2000 |        |        |
|-------|---------|--------|--------|----------|--------|--------|
|       | bs2048  | bs4096 | bs8192 | bs2048   | bs4096 | bs8192 |
| SSGD  | 1.58    | 10.37  | 10.37  | 1.46     | 1.46   | 10.37  |
| DPSGD | 1.59    | 1.60   | 1.66   | 1.45     | 1.47   | 1.47   |

Table 4: Heldout loss comparison for SSGD and DPSGD, evaluated on SWB-300 and SWB-2000. There are 32000 classes in this task, a held-out loss 10.37 (i.e.  $\ln^{32000}$ ) indicates a complete divergence. bs stands for batch size.

|        |       | Eff-B0       | SE-18        | VGG          | Res-18       | Dense-121    | Mobile       | MobileV2     | Shuffle      | Google       | ResNext-29   |
|--------|-------|--------------|--------------|--------------|--------------|--------------|--------------|--------------|--------------|--------------|--------------|
| lr=0.8 | SSGD  | 10.00        | 10.00        | 87.11        | 92.7         | 92.79        | 91.10        | <b>93.22</b> | 92.09        | 93.72        | 92.38        |
|        | DPSGD | <b>91.13</b> | 90.48        | 90.52        | <b>94.34</b> | <b>94.79</b> | <b>91.80</b> | 93.09        | <b>92.36</b> | <b>93.84</b> | 92.55        |
| lr=0.4 | SSGD  | 88.61        | 92.84        | 91.06        | 91.98        | 93.42        | 91.13        | 93.11        | 91.54        | 92.85        | 89.70        |
|        | DPSGD | 89.80        | <b>94.00</b> | <b>91.93</b> | 93.91        | 94.32        | 91.38        | 93.14        | 91.68        | 93.49        | <b>92.79</b> |
| lr=0.2 | SSGD  | 88.03        | 92.41        | 90.51        | 92.13        | 92.98        | 88.38        | 91.68        | 90.14        | 92.44        | 91.31        |
|        | DPSGD | 87.69        | 93.11        | 91.59        | 93.30        | 94.28        | 89.18        | 92.52        | 90.13        | 93.41        | 91.79        |

Table 5: CIFAR-10 with batch size 8192. By reducing learning rate, SSGD can escape early traps but still lags behind DPSGD. Bold text in each column indicates the best accuracy achieved for that model across different learning rate and optimization method configurations. DPSGD consistently delivers the most accurate models.

|           |       | SWB-300 (bs4096) | SWB-300 (bs8192) | SWB-2000 (bs 8192) |
|-----------|-------|------------------|------------------|--------------------|
| lr*=0.1   | SSGD  | 10.37            | 10.37            | 10.37              |
|           | DPSGD | <b>1.60</b>      | <b>1.66</b>      | <b>1.47</b>        |
| lr=0.05   | SSGD  | 10.37            | 10.37            | 10.37              |
|           | DPSGD | 1.65             | 1.73             | 1.48               |
| lr=0.025  | SSGD  | 1.76             | 10.37            | 1.51               |
|           | DPSGD | 1.77             | 1.80             | 1.52               |
| lr=0.0125 | SSGD  | 1.92             | 2.05             | 1.58               |
|           | DPSGD | 1.94             | 2.00             | 1.59               |

Table 6: Decreasing learning rate for SWB-300 and SWB-2000 (bs stands for batch-size). Bold text in each column indicates the best held-out loss achieved across different learning rate and optimization method configurations for the corresponding batch size. DPSGD consistently delivers the most accurate models. \*The learning rate used here corresponds to batch size 256 baseline learning rate, and we still adopt the same learning rate warmup, scaling and annealing schedule. Thus when this learning rate reduces by  $x$ , the overall effective learning rate also reduces by  $x$ .

converging for the first 3 epochs before it starts to diverge. In the SWB-2000 case, we didn’t find any configuration that can escape early traps. Figure 1 characterizes our best-effort Gaussian noise tuning and its comparison against SSGD and DPSGD. A plausible explanation is that Gaussian noise injection escapes saddle points very slowly, since Gaussian noise is isotropic and the complexity for finding local minima is dimension-dependent (Ge et al., 2015). Deep Neural Networks are usually over-parameterized (i.e., high-dimensional), so it may take a long time to escape local traps. In contrast, the heightened landscape-dependent noise in DPSGD is anisotropic (Chaudhari & Soatto, 2018; Feng & Tu, 2020) and can drive the system to escape in the right directions.

**Learning Rate Tuning** Table 5 and Table 6 compare model quality (measured in either test accuracy or held-out loss) for different learning rates in the large batch size setting, for CV and ASR tasks. By using a smaller learning rate, SSGD can escape early traps, yet it consistently lags behind DPSGD in the large batch setting.

*Summary* By systematically introducing landscape-independent noise and reducing the learning rate, SSGD could escape early traps (e.g., saddle points), but results in much inferior models compared to DPSGD in the large batch setting.

#### 4.4 END-TO-END RUN-TIME COMPARISON AND ADVICE FOR PRACTITIONERS

Please refer to Appendix F.

## 5 CONCLUSION

In this paper, we investigate why DPSGD outperforms SSGD in the large batch training. Through detailed analysis on small-scale tasks and an extensive empirical study of a diverse set of modern DL tasks, we conclude that the landscape-dependent noise, which is strengthened in the DPSGD system, brings two benefits in the large batch setting: (1) It adaptively adjusts the effective learning rate according to the loss landscape, helping convergence. (2) It enhances search in weight space to find flat minima with better generalization. Based on our findings, we recommend that DDL practitioners consider DPSGD as an alternative when the batch size must be kept large, e.g., when a shorter run time to reach a reasonable solution is desired.



## REFERENCES

- Mahmoud Assran, Nicolas Loizou, Nicolas Ballas, and Mike Rabbat. Stochastic gradient push for distributed deep learning. In *PMLR, Proceedings of Machine Learning Research*, pp. 344–353. PMLR, 2019.
- Carlo Baldassi, Christian Borgs, Jennifer T. Chayes, Alessandro Ingrosso, Carlo Lucibello, Luca Saglietti, and Riccardo Zecchina. Unreasonable effectiveness of learning neural networks: From accessible states and robust ensembles to basic algorithmic schemes. *Proceedings of the National Academy of Sciences*, 113(48):E7655–E7662, 2016. ISSN 0027-8424. doi: 10.1073/pnas.1608103113. URL <https://www.pnas.org/content/113/48/E7655>.
- Pratik Chaudhari and Stefano Soatto. Stochastic gradient descent performs variational inference, converges to limit cycles for deep networks. *2018 Information Theory and Applications Workshop (ITA)*, Feb 2018. doi: 10.1109/ita.2018.8503224. URL <http://dx.doi.org/10.1109/ita.2018.8503224>.
- Pratik Chaudhari, Anna Choromanska, Stefano Soatto, Yann LeCun, Carlo Baldassi, Christian Borgs, Jennifer Chayes, Levent Sagun, and Riccardo Zecchina. Entropy-sgd: Biasing gradient descent into wide valleys, 2016.
- Jeffrey Dean, Greg S. Corrado, Rajat Monga, Kai Chen, Matthieu Devin, Quoc V. Le, Mark Z. Mao, Marc’Aurelio Ranzato, Andrew Senior, Paul Tucker, Ke Yang, and Andrew Y. Ng. Large scale distributed deep networks. In *NIPS*, 2012.
- Gintare Karolina Dziugaite and Daniel M Roy. Computing nonvacuous generalization bounds for deep (stochastic) neural networks with many more parameters than training data. *arXiv preprint arXiv:1703.11008*, 2017.
- Yu Feng and Yuhai Tu. How neural networks find generalizable solutions: Self-tuned annealing in deep learning. *ArXiv*, abs/2001.01678, 2020.
- Rong Ge, Furong Huang, Chi Jin, and Yang Yuan. Escaping from saddle points—online stochastic gradient for tensor decomposition. In *Conference on Learning Theory*, pp. 797–842, 2015.
- Saeed Ghadimi and Guanghui Lan. Stochastic first-and zeroth-order methods for nonconvex stochastic programming. *SIAM Journal on Optimization*, 23(4):2341–2368, 2013.
- Priya Goyal, Piotr Dollár, Ross B. Girshick, Pieter Noordhuis, Lukasz Wesolowski, Aapo Kyrola, Andrew Tulloch, Yangqing Jia, and Kaiming He. Accurate, large minibatch SGD: training imagenet in 1 hour. *CoRR*, abs/1706.02677, 2017. URL <http://arxiv.org/abs/1706.02677>.
- Kaiming He, Xiangyu Zhang, Shaoqing Ren, and Jian Sun. Deep residual learning for image recognition. *CVPR*, 2015.
- Geoffrey Hinton, Li Deng, Dong Yu, George Dahl, Abdel rahman Mohamed, Navdeep Jaitly, Andrew Senior, Vincent Vanhoucke, Patrick Nguyen, Tara Sainath, and Brian Kingsbury. Deep neural networks for acoustic modeling in speech recognition. *Signal Processing Magazine*, 2012.
- Geoffrey E. Hinton and Drew van Camp. Keeping the neural networks simple by minimizing the description length of the weights. In *Proceedings of the Sixth Annual Conference on Computational Learning Theory*, COLT ’93, pp. 5–13, New York, NY, USA, 1993. ACM. ISBN 0-89791-611-5. doi: 10.1145/168304.168306. URL <http://doi.acm.org/10.1145/168304.168306>.
- Sepp Hochreiter and Jürgen Schmidhuber. Flat minima. *Neural Computation*, 9(1):1–42, 1997.
- Elad Hoffer, Itay Hubara, and Daniel Soudry. Train longer, generalize better: closing the generalization gap in large batch training of neural networks. In *Advances in Neural Information Processing Systems*, pp. 1731–1741, 2017.
- Andrew G. Howard, Menglong Zhu, Bo Chen, Dmitry Kalenichenko, Weijun Wang, Tobias Weyand, Marco Andreetto, and Hartwig Adam. Mobilenets: Efficient convolutional neural networks for mobile vision applications. *CoRR*, abs/1704.04861, 2017. URL <http://arxiv.org/abs/1704.04861>.

- Jie Hu, Li Shen, and Gang Sun. Squeeze-and-excitation networks. *CVPR*, abs/1709.01507, 2018. URL <http://arxiv.org/abs/1709.01507>.
- G. Huang, Z. Liu, L. Van Der Maaten, and K. Q. Weinberger. Densely connected convolutional networks. In *2017 IEEE Conference on Computer Vision and Pattern Recognition (CVPR)*, pp. 2261–2269, 2017.
- Stanisław Jastrzębski, Zachary Kenton, Devansh Arpit, Nicolas Ballas, Asja Fischer, Yoshua Bengio, and Amos Storkey. Three factors influencing minima in sgd. *arXiv preprint arXiv:1711.04623*, 2017.
- Stanisław Jastrzębski, Zachary Kenton, Devansh Arpit, Nicolas Ballas, Asja Fischer, Yoshua Bengio, and Amos J Storkey. Finding flatter minima with sgd. In *ICLR (Workshop)*, 2018.
- Nitish Shirish Keskar, Dheevatsa Mudigere, Jorge Nocedal, Mikhail Smelyanskiy, and Ping Tak Peter Tang. On large-batch training for deep learning: Generalization gap and sharp minima. *arXiv preprint arXiv:1609.04836*, 2016.
- D. P. Kingma and J. L. Ba. ADAM: a method for stochastic optimization. In *International Conference on Learning Representations (ICLR)*, 2015.
- Robert Kleinberg, Yuanzhi Li, and Yang Yuan. An alternative view: When does sgd escape local minima? *arXiv preprint arXiv:1802.06175*, 2018.
- Alex Krizhevsky and Geoffrey Hinton. Learning multiple layers of features from tiny images. *Computer Science Department, University of Toronto, Tech. Rep*, 1(4):7, 2009.
- Alex Krizhevsky, Ilya Sutskever, and Geoffrey E Hinton. Imagenet classification with deep convolutional neural networks. In *Advances in neural information processing systems*, pp. 1097–1105, 2012.
- Sameer Kumar, Victor Bitorff, Dehao Chen, Chiachen Chou, Blake Hechtman, HyounJoong Lee, Naveen Kumar, Peter Mattson, Shibo Wang, Tao Wang, Yuanzhong Xu, and Zongwei Zhou. Scale MLPerf-0.6 models on Google TPU-v3 Pods. *arXiv e-prints*, art. arXiv:1909.09756, September 2019.
- Hao Li, Zheng Xu, Gavin Taylor, Christoph Studer, and Tom Goldstein. Visualizing the loss landscape of neural nets. In S. Bengio, H. Wallach, H. Larochelle, K. Grauman, N. Cesa-Bianchi, and R. Garnett (eds.), *Advances in Neural Information Processing Systems 31*, pp. 6389–6399. Curran Associates, Inc., 2018. URL <http://papers.nips.cc/paper/7875-visualizing-the-loss-landscape-of-neural-nets.pdf>.
- Mu Li, David G Andersen, Jun Woo Park, Alexander J Smola, Amr Ahmed, Vanja Josifovski, James Long, Eugene J Shekita, and Bor-Yiing Su. Scaling distributed machine learning with the parameter server. In *11th {USENIX} Symposium on Operating Systems Design and Implementation ({OSDI} 14)*, pp. 583–598, 2014.
- Xiangru Lian, Ce Zhang, Huan Zhang, Cho-Jui Hsieh, Wei Zhang, and Ji Liu. Can decentralized algorithms outperform centralized algorithms? A case study for decentralized parallel stochastic gradient descent. In *NIPS*, 2017a.
- Xiangru Lian, Ce Zhang, Huan Zhang, Cho-Jui Hsieh, Wei Zhang, and Ji Liu. Can decentralized algorithms outperform centralized algorithms? a case study for decentralized parallel stochastic gradient descent. In *Advances in Neural Information Processing Systems*, pp. 5330–5340, 2017b.
- Xiangru Lian, Wei Zhang, Ce Zhang, and Ji Liu. Asynchronous decentralized parallel stochastic gradient descent. In *ICML*, 2018.
- Kang Liu. *Train CIFAR10 with PyTorch*, 2020. URL <https://github.com/kuangliu/pytorch-cifar>. Available at <https://github.com/kuangliu/pytorch-cifar>.
- Behnam Neyshabur, Srinadh Bhojanapalli, David McAllester, and Nati Srebro. Exploring generalization in deep learning. In *Advances in Neural Information Processing Systems*, pp. 5947–5956, 2017a.

- Behnam Neyshabur, Srinadh Bhojanapalli, and Nathan Srebro. A pac-bayesian approach to spectrally-normalized margin bounds for neural networks. *arXiv preprint arXiv:1707.09564*, 2017b.
- Sashank J. Reddi, Satyen Kale, and Sanjiv Kumar. On the convergence of adam and beyond. In *International Conference on Learning Representations*, 2018. URL <https://openreview.net/forum?id=ryQu7f-RZ>.
- Mark Sandler, Andrew G. Howard, Menglong Zhu, Andrey Zhmoginov, and Liang-Chieh Chen. Inverted residuals and linear bottlenecks: Mobile networks for classification, detection and segmentation. *CVPR*, abs/1801.04381, 2018. URL <http://arxiv.org/abs/1801.04381>.
- K. Simonyan and A. Zisserman. Very deep convolutional networks for large-scale image recognition. *International Conference on Learning Representations*, 2015.
- Samuel L Smith and Quoc V Le. A bayesian perspective on generalization and stochastic gradient descent. *arXiv preprint arXiv:1710.06451*, 2017.
- Christian Szegedy, Wei Liu, Yangqing Jia, Pierre Sermanet, Scott E. Reed, Dragomir Anguelov, Dumitru Erhan, Vincent Vanhoucke, and Andrew Rabinovich. Going deeper with convolutions. *CoRR*, abs/1409.4842, 2014. URL <http://arxiv.org/abs/1409.4842>.
- Mingxing Tan and Quoc V. Le. Efficientnet: Rethinking model scaling for convolutional neural networks. *ICML*, abs/1905.11946, 2019. URL <http://arxiv.org/abs/1905.11946>.
- Ashish Vaswani, Noam Shazeer, Niki Parmar, Jakob Uszkoreit, Llion Jones, Aidan N Gomez, Łukasz Kaiser, and Illia Polosukhin. Attention is all you need. In I. Guyon, U. V. Luxburg, S. Bengio, H. Wallach, R. Fergus, S. Vishwanathan, and R. Garnett (eds.), *Advances in Neural Information Processing Systems 30*, pp. 5998–6008. Curran Associates, Inc., 2017. URL <http://papers.nips.cc/paper/7181-attention-is-all-you-need.pdf>.
- Saining Xie, Ross B. Girshick, Piotr Dollár, Zhuowen Tu, and Kaiming He. Aggregated residual transformations for deep neural networks. *CVPR*, abs/1611.05431, 2017. URL <http://arxiv.org/abs/1611.05431>.
- Yang You, Igor Gitman, and Boris Ginsburg. Scaling SGD batch size to 32k for imagenet training. *CoRR*, abs/1708.03888, 2017. URL <http://arxiv.org/abs/1708.03888>.
- Yang You, Jing Li, Jonathan Hseu, Xiaodan Song, James Demmel, and Cho-Jui Hsieh. Reducing BERT pre-training time from 3 days to 76 minutes. *CoRR*, abs/1904.00962, 2019. URL <http://arxiv.org/abs/1904.00962>.
- Wei Zhang, Suyog Gupta, Xiangru Lian, and Ji Liu. Staleness-aware async-sgd for distributed deep learning. In *Proceedings of the Twenty-Fifth International Joint Conference on Artificial Intelligence, IJCAI 2016, New York, NY, USA, 9-15 July 2016*, pp. 2350–2356, 2016a.
- Wei Zhang, Suyog Gupta, and Fei Wang. Model accuracy and runtime tradeoff in distributed deep learning: A systematic study. In *IEEE International Conference on Data Mining*, 2016b.
- Wei Zhang, Xiaodong Cui, Ulrich Finkler, Brian Kingsbury, George Saon, David Kung, and Michael Picheny. Distributed deep learning strategies for automatic speech recognition. In *ICASSP'2019*, May 2019a.
- Wei Zhang, Xiaodong Cui, Ulrich Finkler, George Saon, Abdullah Kayi, Alper Buyuktosunoglu, Brian Kingsbury, David Kung, and Michael Picheny. A highly efficient distributed deep learning system for automatic speech recognition. In *INTERSPEECH'2019*, Sept 2019b.
- Wei Zhang, Xiaodong Cui, Abdullah Kayi, Mingrui Liu, Ulrich Finkler, Brian Kingsbury, George Saon, Youssef Mroueh, Alper Buyuktosunoglu, Payel Das, David Kung, and Michael Picheny. Improving efficiency in large-scale decentralized distributed training. In *ICASSP'2020*, May 2020.
- Xiangyu Zhang, Xinyu Zhou, Mengxiao Lin, and Jian Sun. Shufflenet: An extremely efficient convolutional neural network for mobile devices. *CVPR*, abs/1707.01083, 2018a. URL <http://arxiv.org/abs/1707.01083>.

Yao Zhang, Andrew M. Saxe, Madhu S. Advani, and Alpha A. Lee. Energy–entropy competition and the effectiveness of stochastic gradient descent in machine learning. *Molecular Physics*, 116 (21-22):3214–3223, Jun 2018b. ISSN 1362-3028. doi: 10.1080/00268976.2018.1483535. URL <http://dx.doi.org/10.1080/00268976.2018.1483535>.

## A RELATED WORK

**Large-batch DDL** To increase parallelism in DDL, one must increase batch size, which more often leads to a deteriorating model accuracy (Zhang et al., 2016b; Kumar et al., 2019). Meticulous task-specific learning rate tuning for large batch training exists in CV training (Goyal et al., 2017; You et al., 2017), NLP training (You et al., 2019) and ASR training (Zhang et al., 2019a). Among them, layer-wise adaptive learning rate tuning scheme (You et al., 2017; 2019) rely on Adam optimizer (Kingma & Ba, 2015), which may diverge on some simple convex functions (Reddi et al., 2018). Researchers found empirically that DPSGD can outperform SSGD in the large batch setting for ASR tasks (Zhang et al., 2019b). Orthogonal to large batch training in DPSGD, (Lian et al., 2018; Assran et al., 2019) improves DPSGD runtime performance by introducing its asynchronous form, (Zhang et al., 2020) improves DPSGD convergence by mixing matrix randomization, (Zhang et al., 2019b) improves DPSGD convergence and runtime by introducing a hierarchical system design.

**Noise Effects in DL** The noise in the stochastic gradient plays an important role in terms of generalization performance in deep learning. Keskar et al. (Keskar et al., 2016) show that large batch training procedure usually finds sharp minima with poor generalization performance. This phenomenon is analyzed from different perspectives, including PAC-Bayesian learning theory (Neyshabur et al., 2017a;b; Dziugaite & Roy, 2017), stochastic differential equation (Jastrzebski et al., 2017), Bayesian inference (Smith & Le, 2017) and optimization theory (Kleinberg et al., 2018). There are several efforts trying to design algorithms to find flat minima that generalize better than SGD (Chaudhari et al., 2016; Jastrzebski et al., 2018). However, all of these works only consider the single learner setting.

## B APPENDIX FOR THE NOISE ANALYSIS

To understand the origin of the noise term  $\vec{\eta}$  in DPSGD, we decompose the gradient  $\vec{g}_j$  for an individual learner- $j$ :

$$\vec{g}_j = \vec{g}_0 + \delta g_j^{(1)} + \delta g_j^{(2)} = \nabla L^\mu(\vec{w}_a) + [\nabla L^{\mu_j}(\vec{w}_a) - \nabla L^\mu(\vec{w}_a)] + [\nabla L^{\mu_j}(\vec{w}_j) - \nabla L^{\mu_j}(\vec{w}_a)], \quad (5)$$

where the first term  $\vec{g}_0 \equiv \nabla L^\mu(\vec{w}_a)$  in the right hand side of Eq. 5 is the gradient of the loss function over the “superbatch”  $\mu$  defined as the sum of all the minibatches for different learners at a given iteration:  $\mu(t) = \sum_{j=1}^n \mu_j(t)$ ; the second term  $\delta g_j^{(1)} \equiv \nabla L^{\mu_j}(\vec{w}_a) - \nabla L^\mu(\vec{w}_a)$  describes the gradient difference (fluctuation) between a minibatch  $\mu_j$  and the superbatches  $\mu$ ; the third term  $\delta g_j^{(2)} \equiv \nabla L^{\mu_j}(\vec{w}_j) - \nabla L^{\mu_j}(\vec{w}_a)$  represents the difference (fluctuation) of the gradients at the individual weight  $\vec{w}_j$  and at the average weight  $\vec{w}_a$ . Note that  $\delta g_j^{(2)} = 0$  in SSGD as the gradients are taken at the average weight  $\vec{w}_a$  for all learners. By taking the average of Eq. 5 over  $j$ , we have:  $\vec{g}_a = \vec{g}_0 + \delta g_a^{(1)} + \delta g_a^{(2)}$  with  $\delta g_a^{(i)} = n^{-1} \sum_{j=1}^n \delta g_j^{(i)}$  ( $i = 1, 2$ ). Here,  $\delta g_a^{(1)}$  vanishes after averaging over all minibatch.  $\delta g_a^{(0)}$  is due to superbatches-superbatch difference and  $\delta g_a^{(2)}$  comes from weight-weight difference in DPSGD. The gradient fluctuation has zero mean and its variance given by:  $\Delta^{(2)} \equiv \alpha^2 \|\delta \vec{g}_a^{(2)}\|^2$ . Finally, the noise strength in DPSGD  $\Delta_{DP}$  can be expressed as:

$$\Delta_{DP} \equiv \|\vec{\eta}\|^2 = \Delta_S + \Delta^{(2)}, \quad (6)$$

where  $\Delta_S \equiv \alpha^2 (\|\vec{g}_0\|^2 - (\vec{g}_0 \cdot \vec{g})^2 / \|\vec{g}\|^2)$  is the SSGD noise strength which is equivalent to the noise strength in a single-learner SGD algorithm with a superbatches (size  $nB$ ). The  $\Delta^{(2)}$  term only exists in DPSGD. In general, this additional contribution makes the learning noise larger in DPSGD than that in SSGD, although noise strength also depends on  $\vec{g}_a$ ,  $\vec{g}_0$ , etc., which may be different for different algorithms.

In Figure 5, we calculated these two noise components of DPSGD for the experiment shown in Fig.1(A). Due to the large batch size we used in the experiment,  $\Delta_S$  is very small during the training process. However, the additional landscape-dependent noise  $\Delta^{(2)}$  in DPSGD can make up for the small SSGD noise when  $nB$  is large and help find flat minima with good generalization performance.

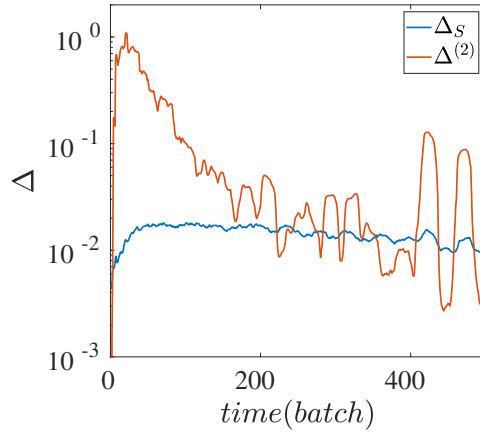

Figure 5: The noise in DPSGD can be decomposed into the SSGD noise  $\Delta_S$  evaluated at the mean weight  $\bar{w}_a$  plus an additional noise  $\Delta^{(2)} (> 0)$ . The additional DPSGD noise  $\Delta^{(2)} \gg \Delta_S$  in the beginning of the training before it decreases to become comparable to  $\Delta_S$ .

## C APPENDIX FOR RESULTS SECTION

Figure 6 illustrates SSGD and DPSGD comparison. SSGD and DPSGD perform comparably up to batch size 4096. When batch size increases up to 8192, DPSGD outperforms SSGD in all but one cases. Noticeably, SSGD diverges in EfficientNet-B0 and SENet-18 when batch-size is 8192.

Figure 7 illustrates heldout loss for SWB-300 and SWB-2000. In SWB-300 task, SSGD diverges beyond batch size 2048 and DPSGD converges well til batch size 8192. In SWB-2000 task, SSGD diverges beyond batch size 4096 and DPSGD converges well til at least batch size 8192.

## D APPENDIX FOR EXPERIMENTAL METHODOLOGY

### D.1 SOFTWARE AND HARDWARE

We use PyTorch 1.1.0 (Torchvision 0.2.0) as the single learner DL engine. Our communication library is built with CUDA 9.2 compiler, the CUDA-aware OpenMPI 3.1.1, and g++ 4.8.5 compiler. Concurrency control of computation threads and communication threads is implemented via Pthreads. We run our experiments on a cluster of 2 8-V100 GPU servers. Each server has 2 sockets and 9 cores per socket. Each core is an Intel Xeon E5-2697 2.3GHz processor. Each server is equipped with 1TB main memory and 8 V100 GPUs. Between servers are 100Gbit/s Ethernet connections. GPUs and CPUs are connected via PCIe Gen3 bus, which has a 16GB/s peak bandwidth in each direction per socket.

### D.2 DATASET AND MODELS

We evaluate on two types of DL tasks: CV and ASR. For CV task, we evaluate on CIFAR-10 dataset (Krizhevsky & Hinton, 2009), which comprises of a total of 60,000 RGB images of size  $32 \times 32$  pixels partitioned into the training set (50,000 images) and the test set (10,000 images). We test CIFAR-10 with 10 representative CNN models (Liu, 2020). The 10 CNN models are: (1) EfficientNet-B0, with a compound coefficient 0 in the basic EfficientNet architecture (Tan & Le, 2019). (2) SENet-18, which stacks Squeeze-and-Excitation blocks (Hu et al., 2018) on top of a ResNet-18 model. (3) VGG-19, a 19 layer instantiation of VGG architecture (Simonyan & Zisserman, 2015). (4) ResNet-18, a 18 layer instantiation of ResNet architecture (He et al., 2015). (5) DenseNet-121, a 121 layer instantiation of DenseNet architecture (Huang et al., 2017). (6) MobileNet, a 28 layer instantiation of MobileNet architecture (Howard et al., 2017). (7) MobileNetV2, a 19 layer instantiation of (Sandler et al., 2018) architecture that improves over MobileNet by introducing linear bottlenecks and inverted residual block. (8) ShuffleNet, a 50 layer instantiation of ShuffleNet

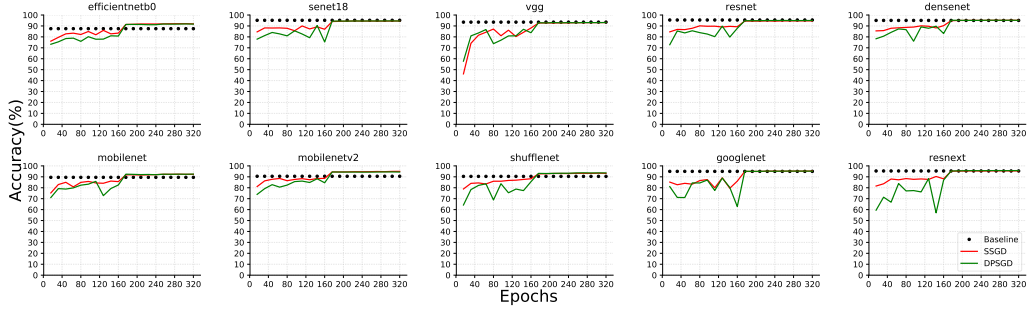

(a) CIFAR-10 convergence, bs=1024, lr=0.1

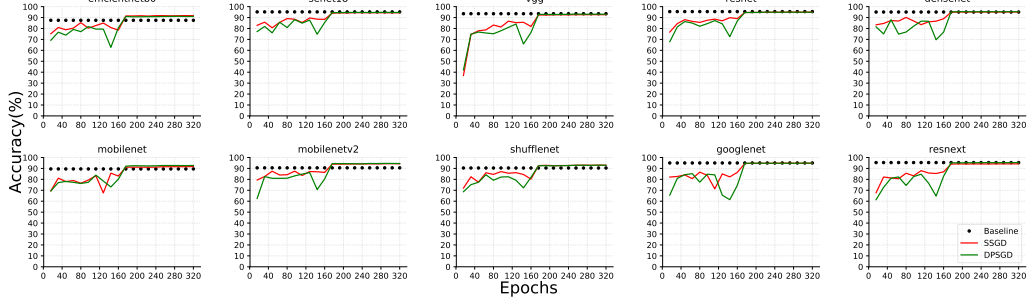

(b) CIFAR-10 convergence, bs=2048, lr=0.2

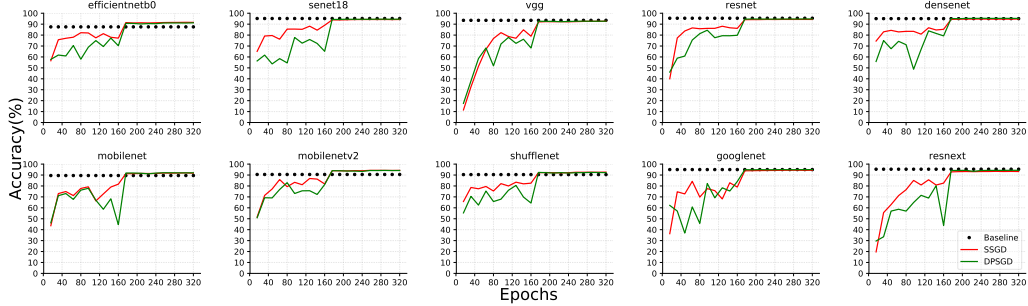

(c) CIFAR-10 convergence, bs=4096, lr=0.4

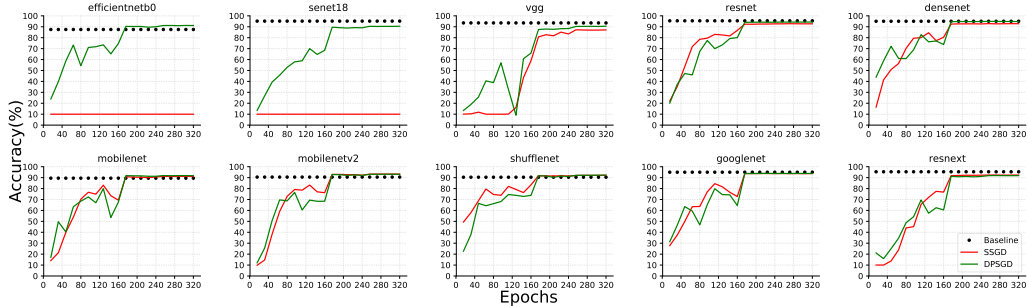

(d) CIFAR-10 convergence, bs=8192, lr=0.8

Figure 6: CIFAR-10 SSGD DPSGD comparison for batch size 2048, 4096 and 8192, with learning rate set as 0.2, 0.4 and 0.8 respectively. All experiments are conducted on 16 GPUs (learners), with batch size per GPU 128,256 and 512 respectively. When batch size is 8192, DPSGD significantly outperforms SSGD. bs stands for batch-size, lr stands for learning rate. The dotted black line represents the bs=128 baseline.

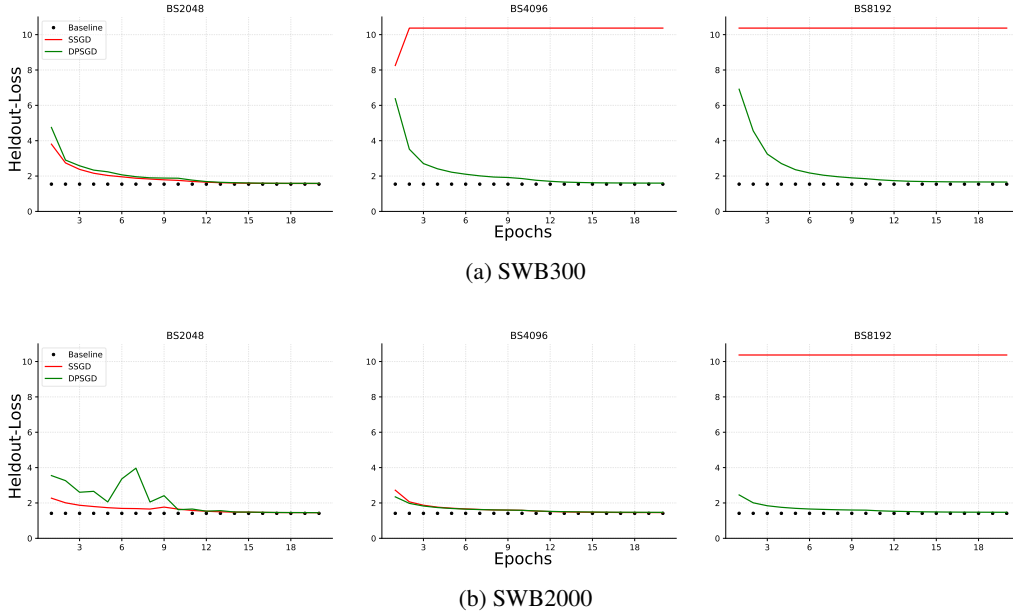

Figure 7: Heldout loss w.r.t epochs for SWB-300 and SWB-2000. Dotted black lines indicate the batch size 256 heldout loss baseline.

|      | CIFAR10         |            |           |            |              |           |
|------|-----------------|------------|-----------|------------|--------------|-----------|
|      | EfficientNet-B0 | SENet-18   | VGG-19    | ResNet-18  | DenseNet-121 | MobileNet |
| Size | 11.11 MB        | 42.95 MB   | 76.45 MB  | 42.63 MB   | 26.54 MB     | 12.27 MB  |
| Time | 2.92 Hr         | 1.58 Hr    | 1.08 Hr   | 1.37 Hr    | 5.48 Hr      | 1.02 Hr   |
|      | CIFAR10         |            |           |            | SWB300       | SWB2000   |
|      | MobileNetV2     | ShuffleNet | GoogLeNet | ResNext-29 | LSTM         | LSTM      |
| Size | 8.76 MB         | 4.82 MB    | 23.53 MB  | 34.82 MB   | 164.62 MB    | 164.62 MB |
| Time | 1.96 Hr         | 2.46 Hr    | 5.31 Hr   | 4.55 Hr    | 26.88 Hr     | 203.21 Hr |

Table 7: Model size and training time. Training time is measured on running on 1 V100 GPU. CIFAR-10 is trained with batch size 128 and 320 epochs. SWB-300 and SWB-2000 are trained with batch size 128 and 16 epochs.

architecture (Zhang et al., 2018a). (9) GoogLeNet, a 22 layer instantiation of Inception architecture (Szegedy et al., 2014). (10) ResNext-29, a 29 layer instantiation of (Xie et al., 2017) with bottlenecks width 64 and 2 sets of aggregated transformations. The detailed model implementation refers to (Liu, 2020). Among these models, ShuffleNet, MobileNet, MobileNet-V2, EfficientNet represent the low memory footprint models that are widely used on mobile devices, where federated learnings is often used. The other models are standard CNN models that aim for high accuracy.

For speech recognition task, we evaluate on SWB-300 and SWB-2000 dataset. The input feature (i.e. training sample) is a fusion of FMLLR (40-dim), i-Vector (100-dim), and logmel with its delta and double delta (40-dim  $\times$  3). SWB-300, whose size is 30GB, contains roughly 300 hour training data of over 4 million samples. SWB-2000, whose size is 216GB, contains roughly 2000 hour training data of over 30 million samples. The size of SWB-300 held-out data is 0.6GB and the size of SWB-2000 held-out data is 1.2GB. The acoustic model is a long short-term memory (LSTM) model with 6 bi-directional layers. Each layer contains 1,024 cells (512 cells in each direction). On top of the LSTM layers, there is a linear projection layer with 256 hidden units, followed by a softmax output layer with 32,000 (i.e. 32,000 classes) units corresponding to context-dependent HMM states. The LSTM is unrolled with 21 frames and trained with non-overlapping feature subsequences of that length. This model contains over 43 million parameters and is about 165MB large.

Table 7 summarizes the model size and training time (on 1 V100 GPU) for evaluated tasks. CV tasks train 320 epochs and all ASR tasks train 16 epochs.



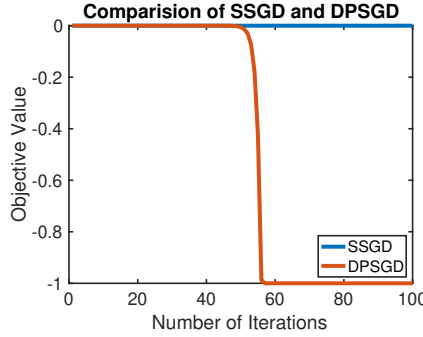

Figure 8: Comparison of SSGD and DPSGD on an synthetic example. SSGD is not able to escape saddle point  $(0, 0)$  while DPSGD efficiently escapes saddle point and find global optima.

## E APPENDIX: NOISE IN DPSGD HELPS ESCAPE SADDLE POINTS

In this section, we consider a simple synthetic problem to illustrate the effect of escaping saddle points of DPSGD. The optimization problem we consider is  $\min_{x_1, x_2} \mathbb{E}_{\xi} [(x_1^2 - x_2^2)\xi]$ , where  $-1 \leq x_1 \leq 1, -1 \leq x_2 \leq 1$  and  $\xi$  follows Gaussian distribution with mean 1 and variance 10. We know that  $(0, 0)$  is the saddle point, and  $(0, 1), (0, -1)$  are global optima. Stochastic gradient with batch size  $B$  can be of form  $\frac{1}{B} \sum_{i=1}^B (2x_1\xi_i, -2x_2\xi_i)$  where  $\xi_i, i = 1, \dots, B$  are i.i.d. random variables following the same distribution as  $\xi$ . We compare the performance of SSGD and DPSGD. The initial point is set to be  $(10^{-20}, 10^{-20})$ , and the learning rate is set to be  $\frac{1}{4}$  since the smoothness parameter of this objective function is 4. For SSGD, we consider batch size 10000 for estimating the gradient. For DPSGD (Lian et al., 2017b), we consider 5 machines setting, each machine calculating gradients using batch size 2000 and communicating with its left and right neighbor. The result is shown in Figure 8. From the figure, we can see that DPSGD is able to escape saddle point while SSGD get stuck around the saddle point.

## F APPENDIX: END-TO-END RUN-TIME COMPARISON AND ADVICE FOR PRACTITIONERS

**End-to-End Run-time Comparison** In all above-mentioned DPSGD and SSGD experiments we used the *same* number of epochs as in the well-tuned single-GPU baseline (i.e., the total computation cost is fixed). When computation cost is fixed, DPSGD inherently runs faster than SSGD because DPSGD requires less messages transmitted and tolerate high-latency network better (Lian et al., 2017a). Table 8 records training time for each representative task (batch size 128 per GPU, 16 GPUs) on both low and high latency networks. Other tasks and batch-size setups show the same trend: DPSGD runs faster than SSGD. Further note that for Eff-B0 (target accuracy 90%) and SWB-2000 (target heldout loss 1.48), DPSGD reaches target model quality with twice the batch size as used in SSGD, all learning rates considered (Table 5, Table 6). Thus DPSGD can effectively use 2X more GPUs. DPSGD achieves target accuracy for Eff-B0 in 0.067 hours and for SWB-2000 in 10.08 hours (64 GPUs). In contrast, SSGD achieves target accuracy for Eff-B0 in 0.19 hours and for SWB-2000 in 23.15 hours (32 GPUs).

*Summary* DPSGD consistently runs faster than SSGD to reach target accuracy in the large batch setting.

|                        |            | Eff-b0 | SE-18 | Res-18 | Dense-121 | Mobile | Google | ResNext-29 | SWB-2000 |
|------------------------|------------|--------|-------|--------|-----------|--------|--------|------------|----------|
|                        | Single-GPU | 2.92   | 1.58  | 1.37   | 5.48      | 1.02   | 5.31   | 4.55       | 203.21   |
| Latency<br>(1 $\mu$ s) | SSGD       | 0.34   | 0.39  | 0.35   | 0.68      | 0.17   | 0.58   | 0.56       | 38.00    |
|                        | DPSGD      | 0.26   | 0.31  | 0.32   | 0.58      | 0.12   | 0.49   | 0.41       | 29.71    |
| Latency<br>(1ms)       | SSGD       | 0.46   | 0.85  | 0.82   | 0.96      | 0.30   | 0.84   | 0.94       | 96.31    |
|                        | DPSGD      | 0.27   | 0.31  | 0.32   | 0.58      | 0.13   | 0.50   | 0.42       | 29.85    |

Table 8: Time (hours) to complete training with batch size 128 per GPU and 16 GPUs in total.

**Advice for Practitioners** In SSGD, when total batch size is fixed, the convergence behavior is the same regardless of the number of learners. In DPSGD, when the number of learners increases, the convergence could be harmed due to too much discrepancy between learners. In another word, we would like a system that has enough system noise so that it can help avoid early training traps but not too much noise so that model convergence is unaffected. In practice, we found that 16-learner setup usually yields the best convergence results in the DPSGD setting, which is consistent with research literature (Lian et al., 2017a; 2018). To make use of a larger number of computing devices in DPSGD, we recommend a hierarchical system design (Zhang et al., 2019b) where we group nearby learners (e.g., on the same server) as one big super-learner and apply DPSGD algorithm only across super-learners. For example, on a 128 GPU cluster, we could group 8 learners as one big super-learner and we apply DPSGD among 16 super-learners. In addition, we also recommend in each iteration, each (super)-learner selects a random neighbor to communicate to further improve convergence. Please refer to (Zhang et al., 2020) for the detailed analysis of how randomized communication improves DPSGD convergence.
